# Supplementary material
Source: MDPI journal article supplement (https://www.mdpi.com/2227-7102/8/2/42)
Supplement: s1 [file s1]

Table displaying the nine questions, the average difficulty and average discrimination of each question, and the average % of students who chose a particular response.

1. How many hydrogens are bonded to the element D?  
Provide a number answer.

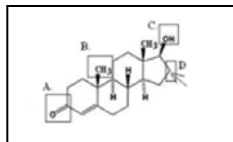

| % Difficulty        | Discrimination | Response |      |      |      |     |
|---------------------|----------------|----------|------|------|------|-----|
| 44                  | 0.44           | 0        | 1    | *2   | 3    | 4   |
| Question 1 % chosen |                | 20.5     | 17.9 | 46.1 | 12.8 | 2.5 |

2. How many lone pairs of electrons are represented in the Lewis dot structure of phosphorus?

- a. 0  
\*b. 1  
c. 2  
d. 3

| % Difficulty        | Discrimination | Response |      |      |    |  |
|---------------------|----------------|----------|------|------|----|--|
| 34.5                | 0.42           | 0        | *1   | 2    | 3  |  |
| Question 2 % chosen |                | 0        | 31.5 | 18.4 | 50 |  |

3. and 4.  
Consider the following images to answer the questions that follow.

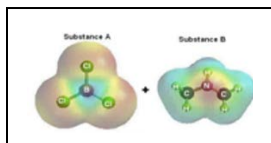

3. Electrons would be transferred from substance A to substance B  
\*B to substance A

| % Difficulty        | Discrimination | Response |         |
|---------------------|----------------|----------|---------|
| 65                  | 0.54           | A to B   | *B to A |
| Question 3 % chosen |                | 31.9     | 68.1    |

4. How many products are formed from the reaction of substance A and substance B?

- \*a. 1  
b. 2  
c. 3  
d. 4

| % Difficulty        | Discrimination | Response |      |     |   |
|---------------------|----------------|----------|------|-----|---|
| 36.4                | 0.39           | *1       | 2    | 3   | 4 |
| Question 4 % chosen |                | 37.7     | 57.7 | 4.4 | 0 |

6. Which of the following statements about propene,  $\text{CH}_3\text{CH}=\text{CH}_2$ , is correct?

- a. All nine atoms lie in the same plane.  
b. The compound has a cis and trans isomer.  
c. It generally acts as a Lewis acid.  
\*d. There are a total of eight sigma bonds.  
e. All the carbon atoms are  $\text{sp}^2$  hybridized.

| % Difficulty        | Discrimination | Response |      |      |      |     |
|---------------------|----------------|----------|------|------|------|-----|
| 65.1                | 0.43           | a        | b    | c    | *d   | e   |
| Question 6 % chosen |                | 0        | 20.5 | 15.3 | 61.5 | 2.5 |

7. All of the following statements about ethene,  $\text{C}_2\text{H}_4$ , are correct EXCEPT

- \*a. The H-C-H bond angles are approximately  $109.5^\circ$ .  
b. All of the hydrogen atoms are in the same plane.  
c. There are a total of five sigma bonds.  
d. The carbon atoms are  $\text{sp}^2$  hybridized.  
e. The H-C-H bond angles are approximately  $120^\circ$ .

| % Difficulty        | Discrimination | Response |     |     |     |      |
|---------------------|----------------|----------|-----|-----|-----|------|
| 59.5                | 0.49           | *a       | b   | c   | d   | e    |
| Question 7 % chosen |                | 55.2     | 2.6 | 2.6 | 7.8 | 34.2 |

12. What is the hybridization of the carbon atoms numbered 1 and 2, respectively, in the following structure?

- a.  $\text{sp}^3$ ,  $\text{sp}^2$   
b.  $\text{sp}^2$ ,  $\text{sp}^2$   
c. sp, sp  
\*d.  $\text{sp}^2$ , sp  
e. sp,  $\text{sp}^2$

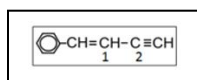

| % Difficulty         | Discrimination | Response |     |      |      |      |
|----------------------|----------------|----------|-----|------|------|------|
| 50.8                 | 0.48           | a        | b   | c    | *d   | e    |
| Question 12 % chosen |                | 21.0     | 5.2 | 13.1 | 47.3 | 13.1 |

13. The compound methylamine,  $\text{CH}_3\text{NH}_2$ , contains a C-N bond. In this bond, which of the following best describes the charge on the nitrogen atom.

- a. +1  
b. slightly positive  
c. uncharged  
\*d. slightly negative  
e. -1

| % Difficulty         | Discrimination | Response |     |      |      |   |
|----------------------|----------------|----------|-----|------|------|---|
| 64.5                 | 0.55           | a        | b   | c    | *d   | e |
| Question 13 % chosen |                | 5.7      | 8.5 | 14.2 | 68.5 | 0 |

14. Which of the following statements about multiple bonds is true?

- a. A double bond consists of two sigma bonds.  
b. A sigma bond results from the side-on overlap of p atomic orbitals.  
c. A pi bond results from the head-on overlap of p atomic orbitals.  
\*d.  $\text{sp}^2$  hybridization in carbon is associated with one double bond and two single bonds.  
e. A triple bond consists of three pi bonds

| % Difficulty         | Discrimination | Response |     |     |    |      |
|----------------------|----------------|----------|-----|-----|----|------|
| 64.6                 | 0.79           | a        | b   | c   | *d | e    |
| Question 14 % chosen |                | 4.0      | 4.0 | 8.0 | 68 | 24.0 |

**Textbook<sup>a</sup> Chapter Numbers and Titles Covered in the Course**

| <b>Chapter</b> | <b>Chapter Title</b>                                                       |
|----------------|----------------------------------------------------------------------------|
| <b>1</b>       | Structure and Bonding: Acids and Bases                                     |
| <b>2</b>       | Alkanes: The Nature of Organic Compounds                                   |
| <b>3</b>       | Alkenes and Alkynes: The Nature of Organic Reactions                       |
| <b>4</b>       | Reactions of Alkenes and Alkynes                                           |
| <b>5</b>       | Aromatic Compounds                                                         |
| <b>6</b>       | Stereochemistry at Tetrahedral Centers                                     |
| <b>7</b>       | Organohalides: Nucleophilic Substitutions and Eliminations                 |
| <b>8</b>       | Alcohols, Phenols, Ethers, and Their Sulfur Analogs                        |
| <b>9</b>       | Aldehydes and Ketones: Nucleophilic Addition Reactions                     |
| <b>10</b>      | Carboxylic Acids and Derivatives: Nucleophilic Acyl Substitution Reactions |
| <b>11</b>      | Carbonyl Alpha-Substitution Reactions and Condensation Reactions           |
| <b>12</b>      | Amines                                                                     |

<sup>a</sup> This organic chemistry course uses *Fundamentals of Organic Chemistry*
